# Supplementary material for: Weight Loss Improves Osteoarthritis Symptoms but hurts bone and cartilage turnover: Analysis of Patient-Reported Outcomes and Biomarkers
Source: Research Square preprint supplement (doi:10.21203/rs.3.rs-7453208/v1), 2025-10-12
Supplement: Supplementary file 1 [file bbd2ccb57b4d06ce85f6f1fe.docx]

Supplementary material for: Weight loss leads to notable effects on OA pain and function but induces bone resorption

# Table S1. Overview of the full studies regarding pain and KL scores.

|  |  | SMC0212301 (N=1176) | SMC0212302 (N=1030) |
| --- | --- | --- | --- |
| Treatment | Pla | 588 (50.0%) | 509 (49.4%) |
|  | sCT | 588 (50.0%) | 521 (50.6%) |
| BMI | Median (Q1, Q3) | 28.4 (25.7, 31.6) | 28.3 (25.5, 31.9) |
| Kellgren-Lawrence grade, target knee | 2 | 1032 (87.8%) | 809 (78.5%) |
|  | 3 | 144 (12.2%) | 221 (21.5%) |
| Kellgren-Lawrence grade, non-target knee | Missing | 12 | 10 |
|  | 0 | 36 (3.1%) | 56 (5.5%) |
|  | 1 | 230 (19.8%) | 186 (18.2%) |
|  | 2 | 644 (55.3%) | 458 (44.9%) |
|  | 3 | 222 (19.1%) | 293 (28.7%) |
|  | 4 | 32 (2.7%) | 27 (2.6%) |
| Womac pain score, 0-500 points, target | Median (Q1, Q3) | 229 (179, 286) | 235 (190, 290) |
|  | Missing | 0 | 1 |
| Womac pain score, 0-500 points, non-target | Median (Q1, Q3) | 173 (90, 253) | 183 (90, 267) |
|  | Missing | 19 | 76 |

# Description S2. Setting the persistent pain group threshold.

We estimated the within-patient variation from screening to month 01 (M01). We found following variations (SD):

**SMC0212301, target knee: 61 WOMAC pain points**

**SMC0212301, non-target knee: 55 WOMAC pain points**

**SMC0212302, target knee: 57 WOMAC pain points**

Based on these SDs we set a lower threshold for minimal pain allowed at M01 at 140 points. The figure below provides an overview of the distribution of patients with persistent pain or lack of persistent pain in the target knee.


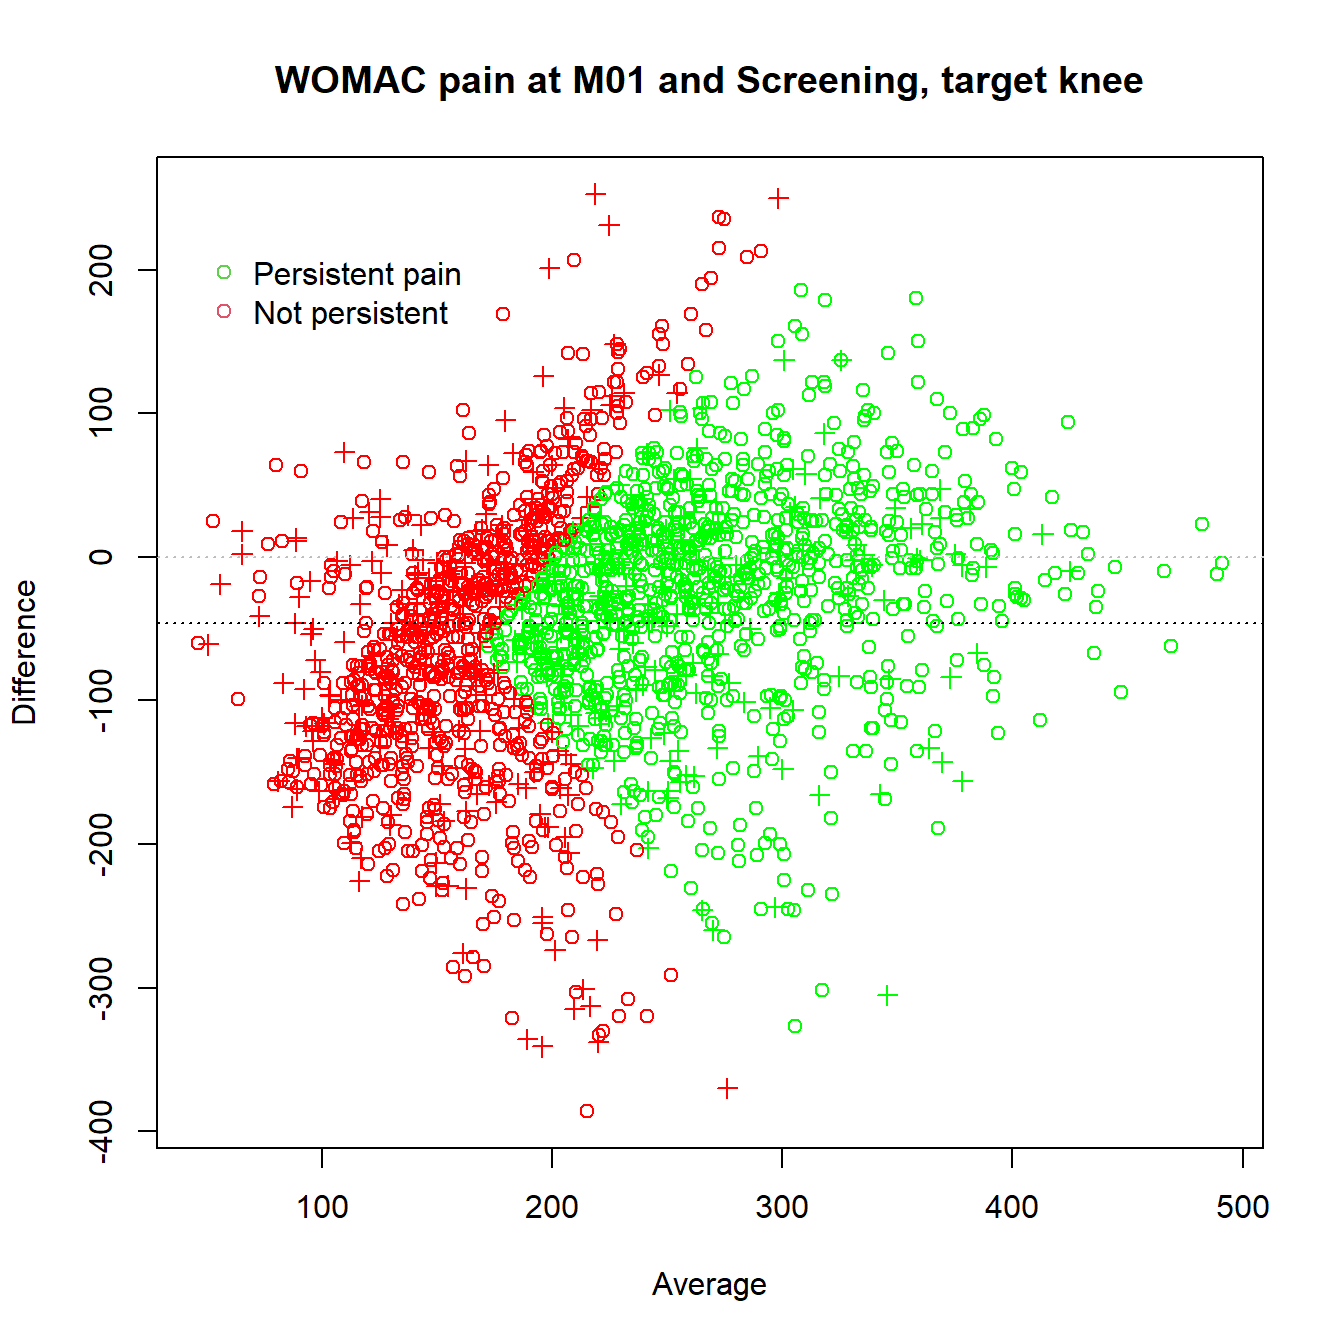


Figure S1. Bland-Altman plot. Distribution of patients with persistent pain in target knee: WOMAC pain >=200 pt at screening and >=140 at month. Crosses marks patients where non-target knee was included.

## Table S3. Association between WOMAC scores and overweight at the baseline

There was a statistically significant difference in the WOMAC scores between the weight groups at baseline. On average, obese patients had higher scores, except for pain, than lean and overweight patients (Table S3).

Table 2. Difference between weight groups at baseline in patients with persistent painful and radiographic knee OA. Data are shown as differences in means with 95% confidence intervals adjusted for sex, age, and race. The p-values are corrected for multiple comparisons by Bonferroni’s method.

|  | Obese vs. Lean | Obese vs. Overweight | Overweight vs. Lean |
| --- | --- | --- | --- |
| WOMAC total | **156 (231, 81)**  **<0.001** | **86 (144, 29)**  **0.010** | 70 (142, -3)  0.18 |
| WOMAC function | **126 (187, 68)**  **<0.001** | **71 (115, 27)**  **0.005** | 55 (111, 0)  0.15 |
| WOMAC stiffness | **16 (24, 8)**  **<0.001** | 7 (13, 0)  0.10 | 9 (17, 1)  0.068 |
| WOMAC pain | 14 (29, -1)  0.18 | 9 (20, -2)  0.36 | 5 (20, -9)  1.0 |

# TABLE S3. BASELINE CHARACTERISTICS OF patients witH WEIGHT MEASUREMENT at 24M versus PATIENT WITHOUT WEIGHT AT 24M

|  | Weight measured at M24 (N=1485) | Weight not measured at M24 (N=721) |
| --- | --- | --- |
| STUDY_CODE |  |  |
| SMC0212301 | 848 (57.1%) | 328 (45.5%) |
| SMC0212302 | 637 (42.9%) | 393 (54.5%) |
| Treatment |  |  |
| Pla | 791 (53.3%) | 306 (42.4%) |
| sCT | 694 (46.7%) | 415 (57.6%) |
| BMI |  |  |
| Median (Q1, Q3) | 28.2 (25.4, 31.6) | 28.5 (25.9, 31.9) |
| Kellgren-Lawrence grade, target |  |  |
| 2 | 1238 (83.4%) | 603 (83.6%) |
| 3 | 247 (16.6%) | 118 (16.4%) |
| Kellgren-Lawrence grade, non-target |  |  |
| N-Miss | 12 | 10 |
| 0 | 60 (4.1%) | 32 (4.5%) |
| 1 | 271 (18.4%) | 145 (20.4%) |
| 2 | 756 (51.3%) | 346 (48.7%) |
| 3 | 344 (23.4%) | 171 (24.1%) |
| 4 | 42 (2.9%) | 17 (2.4%) |
| Womac pain score, 0-500 points, target |  |  |
| Median (Q1, Q3) | 232 (186, 288) | 232 (182, 290) |
| Missing | 0 | 1 |
| Womac pain score, 0-500 points, non-target |  |  |
| Median (Q1, Q3) | 175 (89, 258) | 183 (92, 262) |
| Missing | 49 | 46 |
| Persistent pain at M1 |  |  |
| Missing | 107 | 152 |
| No | 533 (38.7%) | 225 (39.5%) |
| Yes | 845 (61.3%) | 344 (60.5%) |

# Table S4. summary stats for the biomarkers

|  | >5% weight loss (N=98) | Stable (N=638) | >5% weight gain (N=70) | Total (N=806) |
| --- | --- | --- | --- | --- |
| BMI |  |  |  |  |
| Lean/Overweight | 52 (53.1%) | 407 (63.8%) | 40 (57.1%) | 499 (61.9%) |
| Obese | 46 (46.9%) | 231 (36.2%) | 30 (42.9%) | 307 (38.1%) |
| C2M (baseline) |  |  |  |  |
| N | 44 | 351 | 41 | 436 |
| Median (Q1, Q3) | 0.21 (0.15, 0.25) | 0.23 (0.18, 0.32) | 0.22 (0.17, 0.30) | 0.23 (0.17, 0.31) |
| C2M (year 2) |  |  |  |  |
| N | 43 | 350 | 42 | 435 |
| Median (Q1, Q3) | 0.21 (0.16, 0.29) | 0.23 (0.18, 0.32) | 0.20 (0.16, 0.30) | 0.23 (0.17, 0.31) |
| C3M (baseline) |  |  |  |  |
| N | 44 | 351 | 41 | 436 |
| Median (Q1, Q3) | 5.41 (5.12, 6.87) | 6.10 (5.08, 7.28) | 5.89 (5.10, 7.06) | 6.06 (5.09, 7.24) |
| C3M (year 2) |  |  |  |  |
| N | 43 | 350 | 42 | 435 |
| Median (Q1, Q3) | 5.62 (5.08, 7.74) | 6.52 (5.41, 7.80) | 6.45 (5.37, 7.84) | 6.45 (5.34, 7.83) |
| NMID (baseline) |  |  |  |  |
| N | 62 | 417 | 43 | 522 |
| Median (Q1, Q3) | 22.21 (18.07, 27.54) | 21.93 (18.25, 27.52) | 21.22 (17.33, 29.53) | 21.91 (18.16, 27.61) |
| NMID (year 2) |  |  |  |  |
| N | 62 | 419 | 45 | 526 |
| Median (Q1, Q3) | 21.52 (18.09, 28.50) | 21.42 (17.06, 26.02) | 19.44 (16.00, 24.54) | 21.16 (17.06, 26.09) |
| sCTX (baseline) |  |  |  |  |
| N | 62 | 417 | 43 | 522 |
| Median (Q1, Q3) | 0.24 (0.18, 0.29) | 0.24 (0.17, 0.32) | 0.24 (0.17, 0.29) | 0.24 (0.17, 0.32) |
| sCTX (year 2) |  |  |  |  |
| N | 62 | 419 | 45 | 526 |
| Median (Q1, Q3) | 0.40 (0.28, 0.49) | 0.34 (0.23, 0.44) | 0.29 (0.18, 0.38) | 0.34 (0.23, 0.44) |
| uCTX-I (baseline) |  |  |  |  |
| N | 60 | 398 | 43 | 501 |
| Median (Q1, Q3) | 1.70 (1.10, 2.29) | 1.68 (1.13, 2.27) | 1.60 (1.05, 2.44) | 1.68 (1.12, 2.28) |
| uCTX-I (year 2) |  |  |  |  |
| N | 61 | 410 | 41 | 512 |
| Median (Q1, Q3) | 1.84 (1.12, 2.66) | 1.42 (0.95, 2.08) | 1.07 (0.82, 1.60) | 1.43 (0.95, 2.12) |
| uCTX-II (baseline) |  |  |  |  |
| N | 60 | 398 | 43 | 501 |
| Median (Q1, Q3) | 260.00 (168.75, 395.00) | 253.50 (164.50, 373.75) | 260.00 (150.50, 401.00) | 255.00 (162.00, 379.00) |
| uCTX-II (year 2) |  |  |  |  |
| N | 61 | 410 | 41 | 512 |
| Median (Q1, Q3) | 274.00 (160.00, 460.00) | 242.50 (159.25, 353.50) | 232.00 (163.00, 369.00) | 243.00 (160.00, 364.25) |
